# Supplementary material
Source: publisher site journal article supplement (https://www.spandidos-publications.com/7521/downloadSupplementary)
Supplement: Supplementary file 1 [file downloadSupplementary]

Table SI. Partial clinical trial results of CDK4/6 inhibitors.

| A, CDK4/6 inhibitor with AI          |                  |                          |                          |                                              |                                             |                               |                               |
|--------------------------------------|------------------|--------------------------|--------------------------|----------------------------------------------|---------------------------------------------|-------------------------------|-------------------------------|
| Trial                                | CDK4/6 inhibitor | Endocrine treatment      | Total number of patients | Median PFS in combined therapy group, months | Median OS in combined therapy group, months | Reported HR for PFS           | Reported HR for OS            |
| PALOMA-2                             | Palbociclib      | Letrozole                | 444                      | 24.8                                         | Not reported                                | HR 0.58<br>(95% CI 0.46-0.72) | Not reported                  |
| MONALEESA-2                          | Ribociclib       | Letrozole                | 334                      | 25.3                                         | 63.9                                        | HR 0.57<br>(95% CI 0.46-0.70) | HR 0.76<br>(95% CI 0.63-0.93) |
| MONARCH-3                            | Abemaciclib      | Letrozole or anastrozole | 328                      | 28.2                                         | Not reported                                | HR 0.54<br>(95% CI 0.42-0.70) | Not reported                  |
| B, CDK4/6 inhibitor with fulvestrant |                  |                          |                          |                                              |                                             |                               |                               |
| Trial                                | CDK4/6 inhibitor | Endocrine                | Total                    | Median PFS                                   | Median OS in                                | Reported HR                   | Reported HR                   |

|             |             | treatment   | number of patients | in combined therapy group, months | combined therapy group, months | for PFS                       | for OS                        |
|-------------|-------------|-------------|--------------------|-----------------------------------|--------------------------------|-------------------------------|-------------------------------|
| PALOMA-3    | Palbociclib | Fulvestrant | 347                | 9.5                               | 34.9                           | HR 0.46<br>(95% CI 0.36-0.59) | HR 0.81<br>(95% CI 0.64-1.03) |
| MONALEESA-3 | Ribociclib  | Fulvestrant | 484                | 20.5                              | 53.7                           | HR 0.59<br>(95% CI 0.48-0.73) | HR 0.72<br>(95% CI 0.59-0.90) |
| MONARCH-2   | Abemaciclib | Fulvestrant | 446                | 16.9                              | 46.7                           | HR 0.54<br>(95% CI 0.45-0.65) | HR 0.76<br>(95% CI 0.61-0.95) |

AI, aromatase inhibitor; CDK, cyclin-dependent kinase; CI, confidence interval; HR, hazard ratio; OS, overall survival; PFS, progression-free survival.

Table SII. Drugs in clinical trials.

| First author, year    | Drug                    | Stage of development | Type of tumor                                                                                                                              | Trial identifier         | (Refs.) |
|-----------------------|-------------------------|----------------------|--------------------------------------------------------------------------------------------------------------------------------------------|--------------------------|---------|
| Bisi, 2017            | Lerociclib (G1T38)      | Phase II             | ER <sup>+</sup> breast cancer, NSCLC                                                                                                       | NCT02821624, NCT02983071 | (81)    |
| Profitós-Pelejá, 2023 | Narazaciclib (ON123300) | Phase I/II           | MCL                                                                                                                                        | NCT06351644, NCT05705505 | (82)    |
| Freeman-Cook, 2021    | PF-06873600             | Phase I              | HR <sup>+</sup> /HER2 <sup>-</sup> breast cancer, metastatic TNBC or advanced cisplatin-resistant epithelial ovarian/fallopian tube cancer | NCT03519178              | (83)    |
| Liu, 2019             | ETH-155008              | Phase I              | AML                                                                                                                                        | NCT05758610, NCT04840784 | (84)    |
| Carlino, 2018         | AMG925 (FLX925)         | Phase I              | AML                                                                                                                                        | NCT02335814              | (80)    |

AML, acute myeloid leukemia; ER, estrogen receptor; HR, hormone receptor; MCL, mantle cell lymphoma; NSCLC, non-small cell lung cancer; TNBC, triple-negative breast cancer.

Table SIII. Clinical studies of CDK4/6 inhibitors.

| Inhibitor                                        | Other drugs | Stage of development | Patients                                                                           | Objectives of the study                                                                                                                                                                                   | Trial identifier | (Refs.) |
|--------------------------------------------------|-------------|----------------------|------------------------------------------------------------------------------------|-----------------------------------------------------------------------------------------------------------------------------------------------------------------------------------------------------------|------------------|---------|
| Palbociclib<br>or ribociclib                     |             | Phase III            | Patients with<br>HR <sup>+</sup> /HER2 <sup>-</sup><br>metastatic breast<br>cancer | To investigate<br>CDK4/6 inhibitor<br>dosing regimens for<br>patients ≥65 years of<br>age with metastatic<br>breast cancer                                                                                | NCT06377852      |         |
| Palbociclib,<br>ribociclib<br>and<br>abemaciclib | Letrozole   | Phase II             | Patients with<br>advanced ER <sup>+</sup> /HER2 <sup>-</sup><br>breast cancer      | To compare the<br>immunomodulatory<br>effects of palbociclib,<br>ribociclib, abemaciclib<br>and letrozole in the<br>neoadjuvant treatment<br>of ER <sup>+</sup> /HER2 <sup>-</sup> early<br>breast cancer | NCT05766410      |         |

|             |                                            |          |                                                         |                                                                                                                   |             |  |
|-------------|--------------------------------------------|----------|---------------------------------------------------------|-------------------------------------------------------------------------------------------------------------------|-------------|--|
| Abemaciclib | Placebo                                    | Phase II | Patients with WHO grade 3 meningioma                    | To understand how the investigational drug abemaciclib can treat patients with newly diagnosed grade 3 meningioma | NCT05940493 |  |
| Palbociclib | Heat shock protein 90 inhibitor<br>TAS-116 | Phase I  | Patients with refractory solid tumors and Rb deficiency | To evaluate the safety and efficacy of TAS-116 versus palbociclib in the two groups                               | NCT05655598 |  |
| SPH4336     |                                            | Phase II | Patients with dedifferentiated liposarcoma              | To evaluate the safety, blood levels (pharmacokinetics) and preliminary antitumor effects of the CDK4/6 inhibitor | NCT05580588 |  |

|             |                                  |          |                    |                                                                                                                                                                                      |             |  |
|-------------|----------------------------------|----------|--------------------|--------------------------------------------------------------------------------------------------------------------------------------------------------------------------------------|-------------|--|
|             |                                  |          |                    | SPH4336 in patients with selected types of liposarcoma (tumors expressing the investigational drug target)                                                                           |             |  |
| Trilaciclib | Cyclophosphamide and doxorubicin | Phase II | Patients with TNBC | To evaluate the mechanism of action, as well as the safety and efficacy of trilaciclib in combination with standard of care treatment in the neoadjuvant setting of early-stage TNBC | NCT05112536 |  |
| Trilaciclib | Docetaxel and                    | Phase II | Patients with      | To evaluate the effect                                                                                                                                                               | NCT04863248 |  |

|             |                                      |           |                                       |                                                                                                                                                                          |             |      |
|-------------|--------------------------------------|-----------|---------------------------------------|--------------------------------------------------------------------------------------------------------------------------------------------------------------------------|-------------|------|
|             | placebo                              |           | metastatic non-small-cell lung cancer | of trilaciclib on overall survival in patients with metastatic non-small cell lung cancer treated with second - or third-line therapy before administration of docetaxel |             |      |
| Trilaciclib | Placebo, gemcitabine and carboplatin | Phase III | Patients with TNBC                    | To evaluate the safety and efficacy of trilaciclib versus placebo administered prior to gemcitabine and carboplatin in patients receiving first- or second-line          | NCT04799249 | (86) |

|             |         |           |                                                               |                                                                                             |             |      |
|-------------|---------|-----------|---------------------------------------------------------------|---------------------------------------------------------------------------------------------|-------------|------|
|             |         |           |                                                               | treatment for locally advanced unresectable/metastatic TNBC                                 |             |      |
| Abemaciclib |         | Phase II  | Patients with atypical neurofibroma associated with NF1       | To find a safe and tolerable dose of abemaciclib for the treatment of atypical neurofibroma | NCT04750928 |      |
| Trilaciclib | Placebo | Phase III | Patients with metastatic colorectal cancer                    | To evaluate the effect of trilaciclib on osteocyte preservation and antitumor efficacy      | NCT04607668 | (87) |
| Abemaciclib |         | Phase II  | Patients with metastatic castration-resistant prostate cancer | To assess the safety and efficacy of abemaciclib                                            | NCT04408924 |      |

|             |             |             |                                                             |                                                                                                                  |             |  |
|-------------|-------------|-------------|-------------------------------------------------------------|------------------------------------------------------------------------------------------------------------------|-------------|--|
| HS-10342    |             | Phase I     | Patients with solid tumors                                  | To investigate the safety/tolerability and pharmacokinetics of HS-10342 in patients with advanced solid tumors   | NCT04060511 |  |
| Abemaciclib |             | Phase II    | Patients with neuroendocrine tumors of the digestive system | To evaluate the efficacy of abemaciclib in the treatment of patients with digestive system neuroendocrine tumors | NCT03891784 |  |
| G1T38       | Osimertinib | Phase Ib/II | Patients with EGFR mutation-positive metastatic NSCLC       | To investigate the potential clinical benefit of G1T38 in combination with osimertinib in patients               | NCT03455829 |  |

|             |  |          |                                                          |                                                                                                                                                   |             |      |
|-------------|--|----------|----------------------------------------------------------|---------------------------------------------------------------------------------------------------------------------------------------------------|-------------|------|
|             |  |          |                                                          | with EGFR mutation-positive metastatic NSCLC                                                                                                      |             |      |
| Abemaciclib |  | Phase II | Patients with advanced solid tumors of non-breast origin | Targeted therapies were studied, with abemaciclib used to treat patients with genetic abnormalities (including CCND1, CCND2, CCND3, CDK4 or CDK6) | NCT03310879 |      |
| Abemaciclib |  | Phase I  | Advanced or metastatic cancer                            | To investigate the safety of abemaciclib in patients with advanced and/or metastatic cancer                                                       | NCT02919696 | (88) |
| Palbociclib |  | Phase II | Patients with                                            | To investigate the                                                                                                                                | NCT02905318 |      |

|             |  |            |                                                                                                                                                   |                                                                                                                                                           |             |      |
|-------------|--|------------|---------------------------------------------------------------------------------------------------------------------------------------------------|-----------------------------------------------------------------------------------------------------------------------------------------------------------|-------------|------|
|             |  |            | metastatic<br>castration-resistant<br>prostate cancer                                                                                             | effect of palbociclib on<br>prostate cancer                                                                                                               |             |      |
| Ribociclib  |  | Phase I/II | Pediatric patients with<br>non-biopsy-associated<br>DIPG and Rb <sup>+</sup><br>biopsy-associated<br>DIPG and HGG<br>treated with<br>radiotherapy | To study the effect of<br>ribociclib given after<br>radiotherapy                                                                                          | NCT02607124 | (89) |
| Palbociclib |  | Phase II   | Patients with<br>anaplastic<br>oligodendroglioma or<br>oligodendrocyte<br>degenerative<br>disorders                                               | To assess the safety<br>and efficacy of<br>palbociclib in adult<br>patients with<br>oligodendroglioma or<br>recurrent anaplastic<br>oligoastrocytoma with | NCT02530320 |      |

|                     |                       |              |                    |                                                                                                                                                                                                                                                                                           |             |      |
|---------------------|-----------------------|--------------|--------------------|-------------------------------------------------------------------------------------------------------------------------------------------------------------------------------------------------------------------------------------------------------------------------------------------|-------------|------|
|                     |                       |              |                    | the activity of the protein Rb preserved                                                                                                                                                                                                                                                  |             |      |
| Trilaciclib (G1T28) | Placebo and topotecan | Phase Ib/IIa | Patients with SCLC | To investigate the potential clinical benefits of trilaciclib in preserving bone marrow and the immune system to reduce chemotherapy-induced myelosuppression and improve antitumor efficacy in patients previously treated for extensive-stage SCLC prior to administration of topotecan | NCT02514447 | (90) |

|                     |           |          |                                                                |                                                                                                                                   |             |      |
|---------------------|-----------|----------|----------------------------------------------------------------|-----------------------------------------------------------------------------------------------------------------------------------|-------------|------|
| Palbociclib         | Letrozole | Phase I  | Patients with ER <sup>+</sup> /HER2 <sup>-</sup> breast cancer | To evaluate the pharmacokinetics of palbociclib                                                                                   | NCT02499146 | (91) |
| Ribociclib (LEE011) |           | Phase I  | Patients with WHO grade III or IV glioma                       | To evaluate the pharmacokinetics and efficacy of ribociclib (LEE011) in patients with recurrent glioblastoma or anaplastic glioma | NCT02345824 | (92) |
| Abemaciclib         |           | Phase II | Patients with relapsed or refractory mantle cell lymphoma      | To evaluate the disease control rate of abemaciclib in relapsed or refractory mantle cell lymphoma                                | NCT01739309 | (85) |
| PD 0332991          |           | Phase I  | Patients with relapsed and refractory acute                    | Timed sequential dosing and                                                                                                       | NCT01701375 |      |

|  |  |  |                               |                                         |  |  |
|--|--|--|-------------------------------|-----------------------------------------|--|--|
|  |  |  | leukemia and<br>high-risk MDS | pharmacodynamic<br>trials of PD 0332991 |  |  |
|--|--|--|-------------------------------|-----------------------------------------|--|--|

CDK, cyclin-dependent kinase; CCNS, cyclin D; DIPG, diffuse pontine glioma; EGFR, epidermal growth factor receptor; ER, estrogen receptor; HGG, high-grade glioma; HR, hormone receptor; MDS, myelodysplasia; NF1, neurofibromatosis type I; NSCLC, non-small-cell lung cancer; Rb, retinoblastoma; SCLC, small cell lung cancer; TNBC, triple-negative breast cancer; WHO, World Health Organization.

Table SIV. Ongoing clinical trials of combination therapy with CDK4/6 inhibitors and immune checkpoint inhibitors.

| CDK4/6 inhibitors | Immune checkpoint inhibitors | Stage of development | Patients                                                                                                             | Objectives of the study                                                                                                                                                                                                 | Trial identifier   | (Refs.) |
|-------------------|------------------------------|----------------------|----------------------------------------------------------------------------------------------------------------------|-------------------------------------------------------------------------------------------------------------------------------------------------------------------------------------------------------------------------|--------------------|---------|
| Palbociclib       | Avelumab                     | Phase II             | Patients with HR <sup>+</sup> /HER2 <sup>-</sup> metastatic or locally recurrent unresectable invasive breast cancer | To evaluate the activity of fulvestrant alone, fulvestrant and palbociclib, or a combination of fulvestrant, palbociclib and avelumab, in participants with metastatic HR <sup>+</sup> /HER2 <sup>-</sup> breast cancer | NCT03147287 (PACE) | (176)   |
|                   | Pembrolizumab                | Phase II             | Patients with stage                                                                                                  | To evaluate                                                                                                                                                                                                             | NCT02778685        | (171)   |

|  |           |          |                                                                |                                                                                                                                                                    |             |       |
|--|-----------|----------|----------------------------------------------------------------|--------------------------------------------------------------------------------------------------------------------------------------------------------------------|-------------|-------|
|  |           |          | IV metastatic ER <sup>+</sup> /HER2 <sup>-</sup> breast cancer | pembrolizumab versus endocrine therapy and palbociclib in postmenopausal patients with newly diagnosed stage IV ER <sup>+</sup> breast cancer                      |             |       |
|  | Nivolumab | Phase II | Patients with ER <sup>+</sup> /HER2 <sup>-</sup> breast cancer | To evaluate the safety and efficacy of palbociclib and anastrozole with or without nivolumab in participants with ER <sup>+</sup> /HER2 <sup>-</sup> breast cancer | NCT04075604 | (177) |
|  | Avelumab  | Phase II | Patients with                                                  | To evaluate the safety                                                                                                                                             | NCT04841148 |       |

|  |             |          |                                           |                                                                                                                                               |             |  |
|--|-------------|----------|-------------------------------------------|-----------------------------------------------------------------------------------------------------------------------------------------------|-------------|--|
|  |             |          | early-stage ER <sup>+</sup> breast cancer | and early efficacy of hydroxychloroquine or avelumab, with or without palbociclib, in patients with early-stage ER <sup>+</sup> breast cancer |             |  |
|  | Avelumab    | Phase I  | Patients with metastatic TNBC             | To determine the safest doses and schedule for the combination of palbociclib and avelumab                                                    | NCT04360941 |  |
|  | INCMGA00012 | Phase II | Patients with advanced liposarcoma        | To study whether combining the study drugs palbociclib and INCMGA00012 is an                                                                  | NCT04438824 |  |

|             |           |            |                                                       |                                                                                                                            |             |       |
|-------------|-----------|------------|-------------------------------------------------------|----------------------------------------------------------------------------------------------------------------------------|-------------|-------|
|             |           |            |                                                       | effective and safe treatment for advanced liposarcoma                                                                      |             |       |
|             | Avelumab  | Phase I    | Patients with recurrent or metastatic HNSCC           | To determine whether avelumab, cetuximab and palbociclib slow or prevent cancer progression and if they cause side effects | NCT03498378 | (178) |
| Abemaciclib | Nivolumab | Phase I/II | Patients with recurrent or recurrent/metastatic HNSCC | To explore the safety and feasibility of abemaciclib combined with nivolumab in the treatment of patients with             | NCT03655444 |       |

|  |               |          |                                        |                                                                                                                             |             |           |
|--|---------------|----------|----------------------------------------|-----------------------------------------------------------------------------------------------------------------------------|-------------|-----------|
|  |               |          |                                        | recurrent/metastatic HNSCC                                                                                                  |             |           |
|  | Nivolumab     | Phase II | Patients with hepatocellular carcinoma | To evaluate the effectiveness of the combination of nivolumab and abemaciclib for the treatment of hepatocellular carcinoma | NCT03781960 |           |
|  | Pembrolizumab | Phase I  | Patients with NSCLC or breast cancer   | To evaluate the safety and efficacy of abemaciclib in combination with pembrolizumab in participants with advanced NSCLC or | NCT02779751 | (170,179) |

|  |               |          |                                                                                           |                                                                                                                                                     |             |  |
|--|---------------|----------|-------------------------------------------------------------------------------------------|-----------------------------------------------------------------------------------------------------------------------------------------------------|-------------|--|
|  |               |          |                                                                                           | HR <sup>+</sup> /HER2 <sup>-</sup> breast cancer.                                                                                                   |             |  |
|  | Pembrolizumab | Phase II | Patients with metastatic/recurrent HNSCC                                                  | To assess the objective response rate of tumor lesions to abemaciclib in combination with pembrolizumab in patients with metastatic/recurrent HNSCC | NCT03938337 |  |
|  | Pembrolizumab | Phase II | Patients with locally advanced unresectable or metastatic gastroesophageal adenocarcinoma | To test the combination of abemaciclib with pembrolizumab in patients with locally advanced                                                         | NCT03997448 |  |

|  |              |            |                                                                |                                                                                                             |             |       |
|--|--------------|------------|----------------------------------------------------------------|-------------------------------------------------------------------------------------------------------------|-------------|-------|
|  |              |            |                                                                | unresectable or metastatic gastroesophageal adenocarcinoma                                                  |             |       |
|  | LY3300054    | Phase I    | Patients with advanced refractory solid tumors                 | To evaluate the safety and tolerability of LY3300054 in participants with advanced refractory solid tumors. | NCT02791334 | (180) |
|  | Atezolizumab | Phase I/II | Patients with HR <sup>+</sup> /HER2 <sup>-</sup> breast cancer | To evaluate the efficacy and safety of multiple immunotherapy-based treatment combinations in patients with | NCT03280563 |       |

|            |               |         |                                                                                                                   |                                                                                                                                                                                                                             |             |  |
|------------|---------------|---------|-------------------------------------------------------------------------------------------------------------------|-----------------------------------------------------------------------------------------------------------------------------------------------------------------------------------------------------------------------------|-------------|--|
|            |               |         |                                                                                                                   | HR <sup>+</sup> /HER2 <sup>-</sup> breast cancer                                                                                                                                                                            |             |  |
| Ribociclib | Spartalizumab | Phase I | Patients with metastatic HR <sup>+</sup> /HER2 <sup>-</sup> breast cancer or metastatic epithelial ovarian cancer | To study ribociclib in combination with an immunotherapy drug, spartalizumab, as a possible treatment for patients with metastatic HR <sup>+</sup> /HER2 <sup>-</sup> breast cancer or metastatic epithelial ovarian cancer | NCT03294694 |  |
|            | Spartalizumab | Phase I | Patients with recurrent and/or metastatic HNSCC                                                                   | To examine the safety and efficacy of ribociclib and spartalizumab in                                                                                                                                                       | NCT04213404 |  |

|  |               |          |                                                                                    |                                                                                                                                                          |             |  |
|--|---------------|----------|------------------------------------------------------------------------------------|----------------------------------------------------------------------------------------------------------------------------------------------------------|-------------|--|
|  |               |          |                                                                                    | patients with recurrent and/or metastatic HNSCC                                                                                                          |             |  |
|  | Spartalizumab | Phase I  | Patients with esophageal squamous cell carcinoma or gastrointestinal stromal tumor | To investigate the safety, tolerability and preliminary efficacy of combination therapy with either spartalizumab or ribociclib in selected malignancies | NCT04000529 |  |
|  | Spartalizumab | Phase II | Patients with unresectable or metastatic LAG-3 <sup>+</sup> melanoma               | To evaluate the efficacy of novel spartalizumab (PDR001) combinations in                                                                                 | NCT03484923 |  |

|             |              |          |                    |                                                                                                                                                                                                                                                                      |             |       |
|-------------|--------------|----------|--------------------|----------------------------------------------------------------------------------------------------------------------------------------------------------------------------------------------------------------------------------------------------------------------|-------------|-------|
|             |              |          |                    | previously treated unresectable or metastatic melanoma                                                                                                                                                                                                               |             |       |
| Trilaciclib | Atezolizumab | Phase II | Patients with SCLC | To investigate the potential clinical benefit of trilaciclib in preserving the bone marrow and the immune system, and enhancing antitumor efficacy when administered with carboplatin, etoposide, and atezolizumab therapy in first line treatment for patients with | NCT03041311 | (175) |

|  |  |  |  |                                         |  |  |
|--|--|--|--|-----------------------------------------|--|--|
|  |  |  |  | newly diagnosed<br>extensive-stage SCLC |  |  |
|--|--|--|--|-----------------------------------------|--|--|

CDK, cyclin-dependent kinase; ER, estrogen receptor; HNSCC, head and neck squamous cell carcinoma; HR, hormone receptor; NSCLC, non-small-cell lung cancer; SCLC, small cell lung cancer; TNBC, triple-negative breast cancer.

Table SV. Combination therapy with CDK4/6 inhibitors and targeted agents

| Target | Drugs                                                       | Stage of development | Objective                                                                                                                                                                                                                  | Trial identifier | (Refs.) |
|--------|-------------------------------------------------------------|----------------------|----------------------------------------------------------------------------------------------------------------------------------------------------------------------------------------------------------------------------|------------------|---------|
| PI3K   | Palbociclib and taselesib (isPI3Ki) or pictilisib (isPI3Ki) | Phase Ib             | To evaluate the safety, tolerability and efficacy of the PI3K inhibitors taselesib or pictilisib in combination with palbociclib, followed by the addition of fulvestrant in the treatment of PIK3CA-mutated breast cancer | NCT02389842      |         |
|        | Letrozole, LEE011 (CDK4/6 inhibitor) and BYL719 (isPI3Ki)   | Phase II             | To evaluate the efficacy of LEE011, BYL719 and letrozole in the treatment of advanced breast cancer                                                                                                                        | NCT05625087      |         |
|        | Inavolisib (isPI3Ki),                                       | Phase I              | To evaluate the safety and                                                                                                                                                                                                 | NCT03006172      | (186)   |

|     |                                               |              |                                                                                                                                                                                                         |             |  |
|-----|-----------------------------------------------|--------------|---------------------------------------------------------------------------------------------------------------------------------------------------------------------------------------------------------|-------------|--|
|     | fulvestrant and letrozole                     |              | tolerability of inavolisib as a single oral agent in patients with locally advanced or metastatic PIK3CA-mutated solid tumors, including breast cancer                                                  |             |  |
|     | CYH33, fulvestrant, letrozole and palbociclib | Phase Ib     | To evaluate the safety and tolerability of CYH33 combined with endocrine therapy with or without palbociclib in patients with PIK3CA-mutated, HR <sup>+</sup> /HER2 <sup>-</sup> advanced breast cancer | NCT04856371 |  |
| AKT | Capivasertib (AKTi), fulvestrant and          | Phase Ib/III | To evaluate the efficacy and safety of capivasertib in                                                                                                                                                  | NCT04862663 |  |

|      |                                                       |           |                                                                                                                                                                  |             |       |
|------|-------------------------------------------------------|-----------|------------------------------------------------------------------------------------------------------------------------------------------------------------------|-------------|-------|
|      | palbociclib                                           |           | combination with CDK4/6 inhibitors and fulvestrant in patients with locally advanced (inoperable) or metastatic HR <sup>+</sup> /HER2 <sup>-</sup> breast cancer |             |       |
|      | Ipatasertib (AKTi),<br>fulvestrant and<br>palbociclib | Phase II  | To evaluate the efficacy of adding ipatasertib to standard care with a CDK4/6 inhibitor plus fulvestrant                                                         | NCT04920708 |       |
|      | Ipatasertib (AKTi),<br>fulvestrant and<br>palbociclib | Phase I   | To evaluate the safety and tolerability of ipatasertib with or without palbociclib, either with an aromatase inhibitor or fulvestrant                            | NCT03959891 |       |
| mTOR | Everolimus (mTORi),                                   | Phase III | To compare the efficacy                                                                                                                                          | NCT00863655 | (187) |

|                                                      |                   |                                                                                                                                                                                                                          |                    |              |
|------------------------------------------------------|-------------------|--------------------------------------------------------------------------------------------------------------------------------------------------------------------------------------------------------------------------|--------------------|--------------|
| <p>exemestane and everolimus placebo</p>             |                   | <p>and safety of exemestane plus everolimus with exemestane plus placebo in postmenopausal women with ER<sup>+</sup>, locally advanced or metastatic breast cancer that was resistant to NSAI</p>                        |                    |              |
| <p>Ribociclib, everolimus (mTORi) and exemestane</p> | <p>Phase I/II</p> | <p>To determine whether the triple combination of ribociclib, everolimus and exemestane is safe and effective in the treatment of locally advanced/metastatic breast cancer after treatment with a CDK 4/6 inhibitor</p> | <p>NCT02732119</p> |              |
| <p>Palbociclib, everolimus</p>                       | <p>Phase I/II</p> | <p>To determine the safe and</p>                                                                                                                                                                                         | <p>NCT02871791</p> | <p>(185)</p> |

|  |                |  |                                                                                                                                                 |  |  |
|--|----------------|--|-------------------------------------------------------------------------------------------------------------------------------------------------|--|--|
|  | and exemestane |  | tolerable dose of<br>palbociclib, everolimus and<br>exemestane in patients with<br>ER <sup>+</sup> /HER2 <sup>-</sup> advanced breast<br>cancer |  |  |
|--|----------------|--|-------------------------------------------------------------------------------------------------------------------------------------------------|--|--|

AKTi, AKT inhibitor; CDK, cyclin-dependent kinase; ER, estrogen receptor; HR, hormone receptor; NSAI, non-steroidal aromatase inhibitors; isPI3Ki, isomer-specific PI3K inhibitor; mTORi, mTOR inhibitor.
